# Supplementary material for: TechMark: a framework for the development, engagement, and motivation of software teams in IT organizations based on gamification
Source: PeerJ Comput Sci. 2024 Sep 19;10:e2285. doi: 10.7717/peerj-cs.2285 (PMC11419635; doi:10.7717/peerj-cs.2285)
Supplement: Supplemental Information 1 [file peerj-cs-10-2285-s001.xlsx]

## Sheet: Sheet1
Sr.	QUESTIONAIRE
1	On a scale of 1 to 10, how would you rate your motivation level when using the TechMark gamified application to complete routine tasks?
2	Please enter a numeric value representing the count of total tasks completed and submitted during the specified time
3	Please provide a numeric value to represent the average marks you received from the Project Manager in terms of code quality.
4	Kindly enter a numeric value to represent the average task scores given by the Project Manager for each task completed.
5	Please provide a numeric value indicating how many new courses or technologies you learned during the experiment period.
6	Please enter a numeric value representing the count of tasks that were submitted on time
7	How would you rate the effectiveness of TechMark in facilitating collaborative scores achieved in team tasks? (Numeric scale: 1 - Not Effective, 10 - Highly Effective)
8	Please enter a numeric value indicating the amount of collaborative scores achieved in team tasks during the specified period.
9	On a scale of 1 to 10, how enjoyable do you find completing routine tasks with the gamified approach in TechMark?
10	To what extent do you believe TechMark positively influences your overall job satisfaction? (Numeric scale: 1 - Negatively, 10 - Positively)
11	What numeric score would you assign to the likelihood of recommending the use of TechMark to your colleagues for task completion?
