# Supplementary material for: TechMark: a framework for the development, engagement, and motivation of software teams in IT organizations based on gamification
Source: PeerJ Comput Sci. 2024 Sep 19;10:e2285. doi: 10.7717/peerj-cs.2285 (PMC11419635; doi:10.7717/peerj-cs.2285)
Supplement: Supplemental Information 2 [file peerj-cs-10-2285-s002.xlsx]

## Sheet: Sheet1
EMPLOYEE	GROUP	TASK COMPLETED	TASK SCORES	CODE QUALITY	TIMELINESS OF TASKS COMPLETED	NEW COURSES LEARNED	SCORES IN TEAM TASKS
1	Intervention Group	20	187	86	18	5	60
2	Intervention Group	12	109	47	11	1	58
3	Intervention Group	20	178	86	17	2	55
4	Intervention Group	12	113	48	10	1	61
5	Intervention Group	18	145	86	17	6	60
6	Intervention Group	16	134	70	14	5	65
7	Intervention Group	18	156	82	17	4	68
8	Intervention Group	12	112	53	10	1	70
9	Intervention Group	13	113	58	11	2	62.5
10	Intervention Group	16	154	73	11	4	65
11	Intervention Group	17	165	79	15	5	64
12	Intervention Group	15	134	73	14	4	63.5
13	Intervention Group	16	145	80	15	4	68
14	Intervention Group	16	134	71	16	5	69
15	Intervention Group	18	165	83	18	6	70
16	Intervention Group	19	198	87	18	5	59
17	Intervention Group	20	178	95	18	6	63
18	Intervention Group	22	209	101	21	6	59
19	Intervention Group	12	108	50	10	1	66.5
20	Intervention Group	13	121	57	11	4	67
21	Intervention Group	14	125	61	12	5	69
22	Intervention Group	15	132	67	10	4	64
23	Intervention Group	16	143	71	11	3	63
24	Intervention Group	12	112	51	10	2	66
25	Intervention Group	13	123	61	11	5	68
1	Control Group	10	87	43	7	1	58
2	Control Group	16	138	76	10	1	62
3	Control Group	11	98	41	11	2	57.5
4	Control Group	14	101	59	10	2	56
5	Control Group	14	112	56	10	0	54
6	Control Group	12	95	57	8	2	55.5
7	Control Group	13	109	50	9	1	53
8	Control Group	11	99	55	7	2	62
9	Control Group	15	134	69	10	1	49
10	Control Group	13	109	60	11	1	61
11	Control Group	16	141	81	9	3	56.5
12	Control Group	13	109	54	11	1	54
13	Control Group	12	106	51	7	0	42
14	Control Group	11	94	50	7	0	46.5
15	Control Group	10	95	41	7	3	36
16	Control Group	12	100	46	9	2	57
17	Control Group	12	101	45	9	1	54
18	Control Group	11	98	41	8	0	49
19	Control Group	11	85	45	7	0	53.5
20	Control Group	10	96	52	8	3	33
21	Control Group	14	76	65	10	2	54
22	Control Group	12	105	48	9	1	61
23	Control Group	10	92	49	8	0	38
24	Control Group	11	95	45	9	2	56
25	Control Group	12	104	54	9	1	53
